# Supplementary material for: Biochemical and Functional Characterization of Mouse Mammary Tumor Virus Full-Length Pr77Gag Expressed in Prokaryotic and Eukaryotic Cells
Source: PubMed Central journal article supplement (PMC6024702; doi:10.3390/v10060334), 2018-06-18
Supplement: viruses-10-00334-s001.pdf [file viruses-10-00334-s001.pdf]

# Supplementary Data

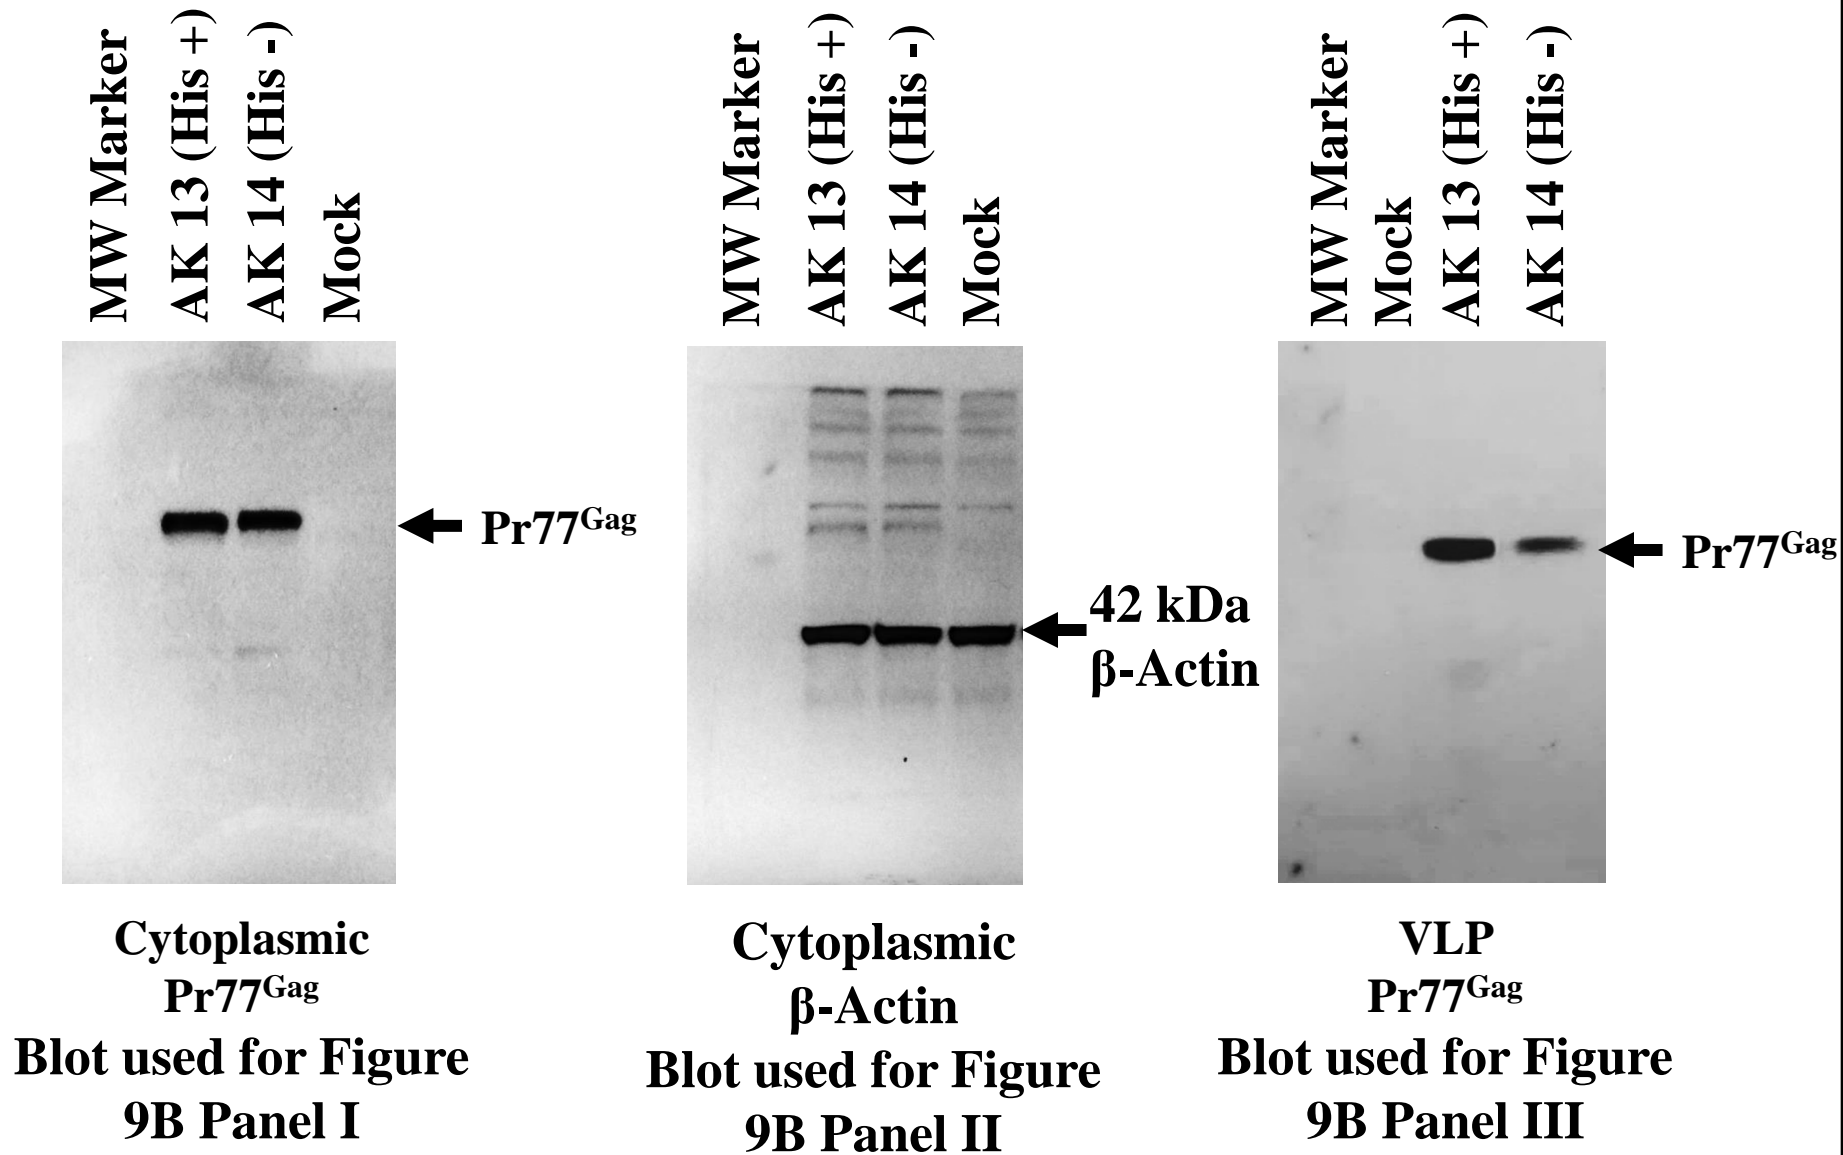

## Supplementary Data

MW Marker

Mock

AK 13 (His +)

AK 14 (His -)

(-) Control

-

(+) Control

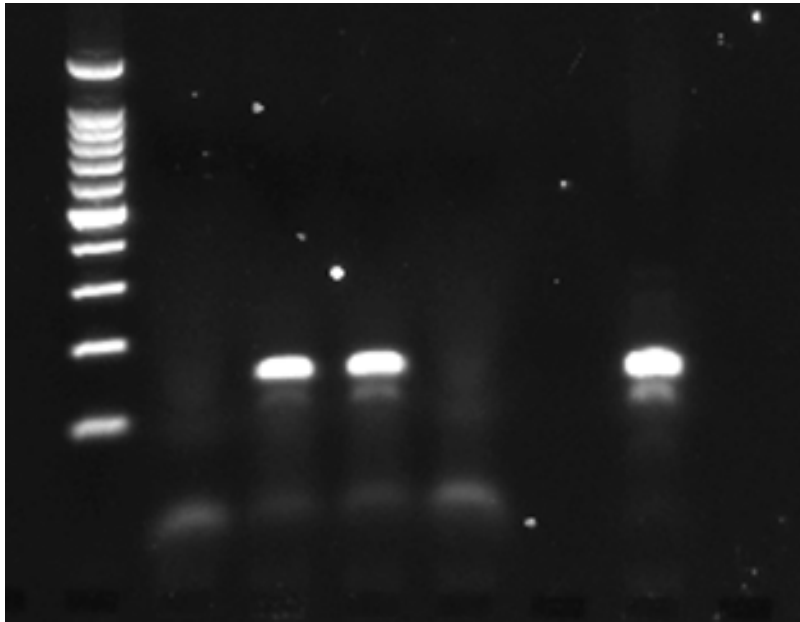

cDNAs from cytoplasmic  
RNA

Agarose gel picture used for  
Figure 9B Panel IV

MW Marker

Mock

AK 13 (His +)

AK 14 (His -)

(-) Control

-

(+) Control

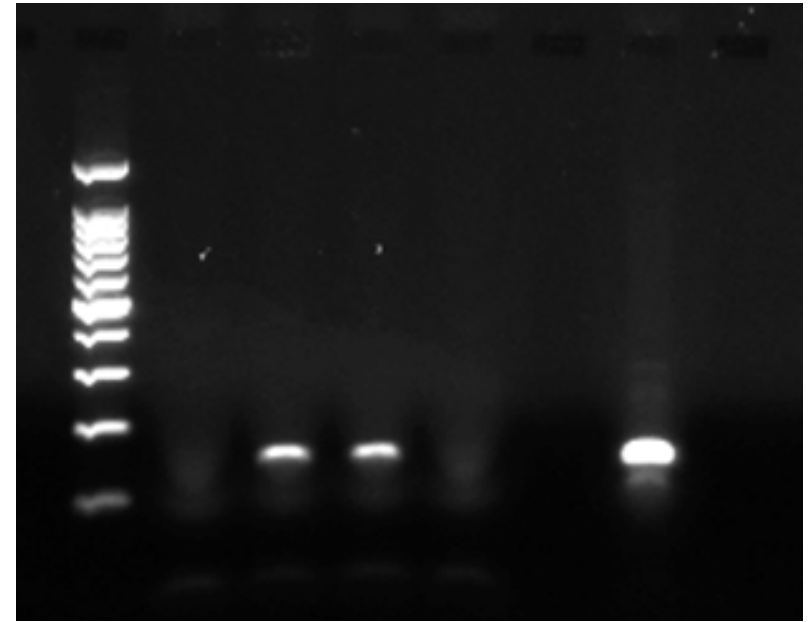

cDNAs from packaged viral  
RNA

Agarose gel picture used  
for Figure 9B Panel V
